# Supplementary material for: Health Professional vs Layperson Values and Preferences on Scarce Resource Allocation
Source: PubMed Central journal article supplement (PMC10933708; doi:10.1001/jamanetworkopen.2024.1958), 2024-03-12
Supplement: jamanetwopen-e241958-s002.pdf [file jamanetwopen-e241958-s002.pdf]

## Data Sharing Statement

Buhr. Health Professional vs Layperson Values and Preferences on Scarce Resource Allocation. *JAMA Netw Open*. Published March 12, 2024.

doi:10.1001/jamanetworkopen.2024.1958

### Data

**Data available:** Yes

**Data types:** Deidentified participant data, Data dictionary

**How to access data:** Data will be made available upon reasonable request and executed data use agreement with the authors.

**When available:** With publication

### Supporting Documents

**Document types:** None

### Additional Information

**Who can access the data:** Researchers whose proposed use of data has been approved.

**Types of analyses:** For research analyses

**Mechanisms of data availability:** With investigator support after approval of a proposal and a signed data use agreement.

**Any additional restrictions:** N/A
